# Supplementary material for: Solution structure of the second bromodomain of Brd2 and its specific interaction with acetylated histone tails
Source: PubMed Central journal article supplement (PMC2065866; doi:10.1186/1472-6807-7-57), 2007-09-12

## Additional file 2

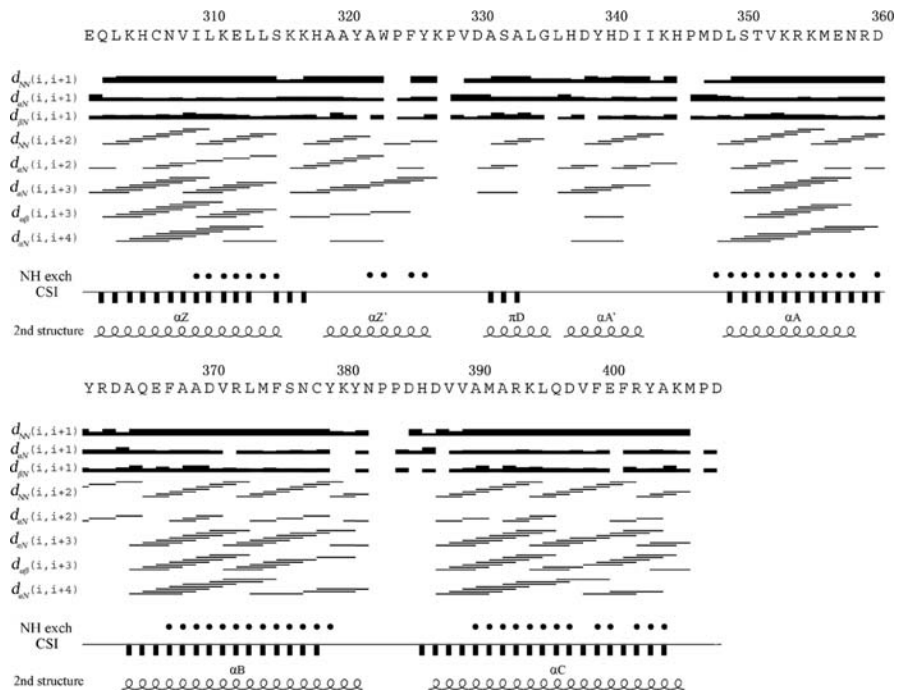

Supplement: 1472-6807-7-57-S2.pdf [file 1472-6807-7-57-S2.pdf]
