# Supplementary material for: Solution structure of the second bromodomain of Brd2 and its specific interaction with acetylated histone tails
Source: PubMed Central journal article supplement (PMC2065866; doi:10.1186/1472-6807-7-57), 2007-09-12

Additional file 3

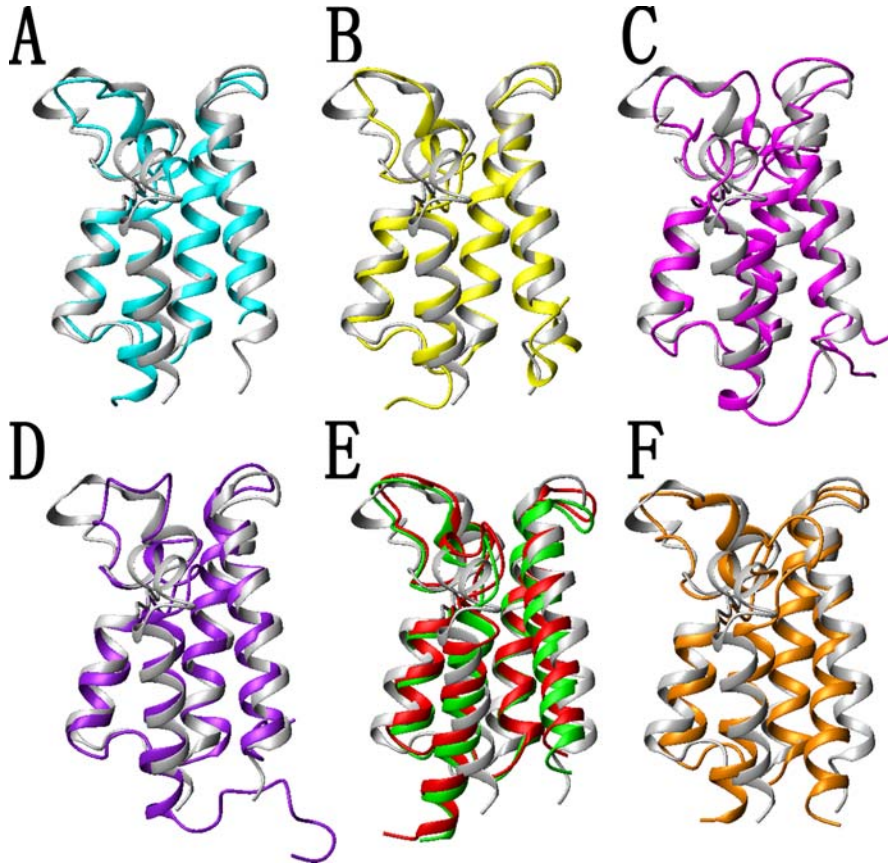

Supplement: 1472-6807-7-57-S3.pdf [file 1472-6807-7-57-S3.pdf]
