# Supplementary material for: Solution structure of the second bromodomain of Brd2 and its specific interaction with acetylated histone tails
Source: PubMed Central journal article supplement (PMC2065866; doi:10.1186/1472-6807-7-57), 2007-09-12
Supplement: 1472-6807-7-57-S4.pdf [file 1472-6807-7-57-S4.pdf]

**Additional file 4**

| Mutations of Brd2 BD2 | Amide resonances disturbed from mutations                                                                                                                                                                                     |
|-----------------------|-------------------------------------------------------------------------------------------------------------------------------------------------------------------------------------------------------------------------------|
| V329A                 | residues including W323 to M347 in the ZA loop, L349 and T351 in the amino terminus of helix $\alpha$ A, M374 to Y381 in the carboxy terminus of helix $\alpha$ B, N382 and D387 in the BC loop.                              |
| L334A                 | residues including D330 to D341                                                                                                                                                                                               |
| L336A                 | residues including K327 to M347 in the ZA loop, L349 and T351 in the amino terminus of helix $\alpha$ A, S376 and C378 to N382 in the carboxy terminus of helix $\alpha$ B and in the BC loop.                                |
| N382A                 | residues including W323 to M347 in the ZA loop, L349 and T351 in the amino terminus of helix $\alpha$ A, R372 to F399 comprised the carboxy terminus of helix $\alpha$ B, the BC loop and the amino half of helix $\alpha$ C. |
